# Supplementary material
Source: PubMed Central journal article supplement (PMC3356822)

## **Xie et al. Supplemental Figures**

**Supplemental Figure 1. Alignment of human H2AX and *S. cerevisiae* H2A protein sequences.**

**Supplemental Figure 2. Effect of H2AX mutations on HR.** Percentage of I-SceI-induced GFP<sup>+</sup> cells from *H2A.X*<sup>-/-</sup> HR reporter mouse ES cells stably expressing H2AX mutants as indicated in **(a and b)**. Bars represent mean of triplicates. Error bars indicate s.e.m.

*Homo Sapiens:* MS-GRGKTGG KARAKAKSRS SRAGLQFPVG RVHRLLRKGH YAERVGAGAP  
*S. cerevisiae:* MSGGKGGKAG SAAKASQSRS AKAGLTFPVG RVHRLLRGN YAQRIGSGAP

*Homo Sapiens:* VYLAADVLEYL TAEILELAGN AARDNKKTRI IPRHLQLAIR NDEELNKLLG  
*S. cerevisiae:* VYLTAVLEYL AAEILELAGN AARDNKKTRI IPRHLQLAIR NDDELNKLLG

*Homo Sapiens:* GVTIAQGGVL PNIQAVLLPK KTSATVGPKA PSGGKKATQAS QEY  
*S. cerevisiae:* NVTIAQGGVL PNIHQNLLPK KS-A---K---AT-K---AS QEL

**a**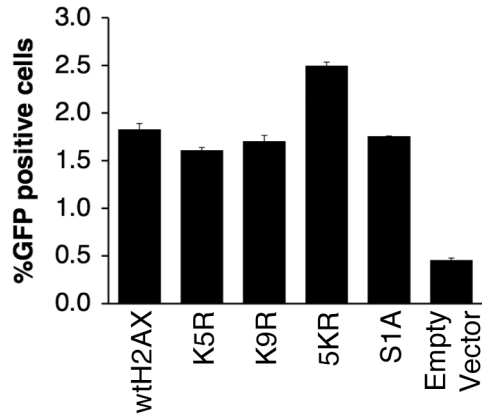**b**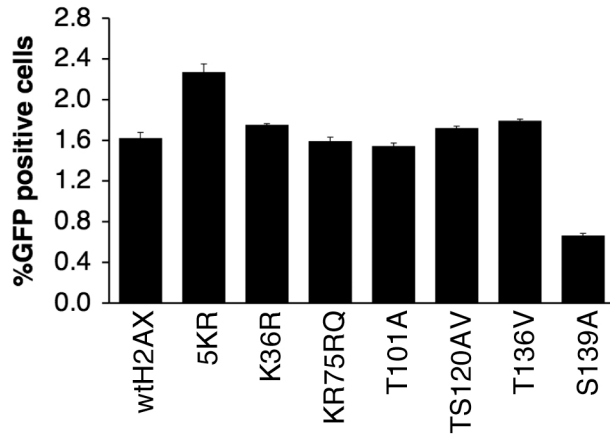

Supplement: cc0917_3602SD1.pdf [file cc0917_3602SD1.pdf]
